# Supplementary material
Source: publisher figshare collection journal article supplement (https://gsajournals.figshare.com/ndownloader/files/12725153)
Supplement: Supplementary file 1 [file 12725153]

## Sheet: Table S4-GenomeAssemblyStats
Table S5: Assembly statistics and BUSCO scores for reference genomes and unpolished genomes assembled using either all reads or only those that passed filter before polishing.
						Assembly Statistics						BUSCO Scores
Species	Assembly Name	Reads	Racon Runs	Pilon Runs		Assembly Size (bp)	Contigs	N50 (bp)	Contigs >100Kb	Contigs >1Mb		Complete (%)	Complete and Single Copy (%)	Complete and duplicated (%)	Fragmented (%)	Missing (%)	BUSCOs Tested
D. ananassae	Dana-all-chromosome-r1.05.fasta	published	0	0		230993012	13749	4599533	100	29		98.2	97	1.2	0.2	1.6	978
D. biarmipes	Dbia_2.0.fasta	published	0	0		169378599	5523	3386121	95	32		98.6	96.9	1.7	0.1	1.3	978
D. bipectinata	Dbip_2.0.fasta	published	0	0		167263958	5500	663995	124	35		98.2	96.3	1.9	0.1	1.7	978
D. erecta	Dere-all-chromosome-r1.05.fasta	published	0	0		152712140	5124	18748788	38	8		98.6	96.9	1.7	0.1	1.3	978
D. eugracilis	Deug_2.0.fasta	published	0	0		156942009	4946	976885	150	38		98.5	96.8	1.7	0.1	1.4	978
D. mauritiana	Dmau_MS17_all_chromosomes_r.1.0.fasta	published	0	0		117658370	16	21136018	12	7		98.6	97.1	1.5	0.1	1.3	978
D. mojavensis	Dmoj-all-chromosome-r1.04.fasta	published	0	0		193826310	6841	24764193	51	12		98.2	96.2	2	0.3	1.5	978
D. persimilis	Dper-all-chromosome-r1.3.fasta	published	0	0		188374079	12838	1869541	142	30		96.6	94.5	2.1	1.1	2.3	978
D. pseudoobscura	Dpse-all-chromosome-r3.04.fasta	published	0	0		152696384	4790	12541198	25	13		97	94.2	2.8	0.3	2.7	978
D. sechellia	Dsec-all-chromosome-r1.3.fasta	published	0	0		166577145	14730	2123299	101	23		97.2	95.5	1.7	1.1	1.7	978
D. simulans	Dsim-all-chromosome-r2.02.fasta	published	0	0		124963774	7619	23539531	8	6		98.6	97.1	1.5	0.2	1.2	978
D. virilis	Dvir-all-chromosome-r1.06.fasta	published	0	0		206026697	13530	10161210	79	22		97.5	95.9	1.6	0.3	2.2	978
D. willistoni	Dwil-all-chromosome-r1.05.fasta	published	0	0		235516348	14838	4511350	80	38		98.4	95.5	2.9	0	1.6	978
D. yakuba	Dyak-all-chromosome-r1.05.fasta	published	0	0		165693946	8122	21770863	60	8		98.5	93.5	5	0.1	1.4	978
D. ananassae	Dana.2.1.0.pass.miniasm.assembly.fasta	pass	0	0		188559244	371	2598683	147	44		1.3	1.3	0	4.3	94.4	978
D. biarmipes	Dbia.2.1.0.pass.miniasm.assembly.fasta	pass	0	0		184648614	666	2823469	224	32		3.8	3.8	0	9.6	86.6	978
D. bipectinata	Dbip.2.1.0.pass.miniasm.assembly.fasta	pass	0	0		160478943	570	552498	354	26		1.7	1.7	0	3.4	94.9	978
D. erecta	Dere.2.1.0.pass.miniasm.assembly.fasta	pass	0	0		127726978	58	16649012	29	21		2.5	2.5	0	4.5	93	978
D. eugracilis	Deug.2.1.0.pass.miniasm.assembly.fasta	pass	0	0		156418529	547	985231	256	42		0.8	0.8	0	2.6	96.6	978
D. mauritiana	Dmau.2.1.0.pass.miniasm.assembly.fasta	pass	0	0		131925277	272	4650831	64	28		1.4	1.4	0	3.3	95.3	978
D. mojavensis	Dmoj.2.1.0.pass.miniasm.assembly.fasta	pass	0	0		162137138	122	5048217	86	39		0.5	0.5	0	1.9	97.6	978
D. persimilis	Dper.2.1.0.pass.miniasm.assembly.fasta	pass	0	0		165656918	415	3459083	146	35		0.4	0.4	0	3.2	96.4	978
D. pseudoobscura	Dpse.2.1.0.pass.miniasm.assembly.fasta	pass	0	0		160476330	361	3001701	143	33		1.7	1.7	0	4.9	93.4	978
D. sechellia	Dsec.2.1.0.pass.miniasm.assembly.fasta	pass	0	0		133415705	109	7428899	59	23		1.5	1.5	0	3.7	94.8	978
D. simulans	Dsim.2.1.0.pass.miniasm.assembly.fasta	pass	0	0		132216724	76	7666850	61	24		2.7	2.7	0	7.4	89.9	978
D. triauraria	Dtriauraria.2.1.0.pass.miniasm.assembly.fasta	pass	0	0		170526418	482	723048	339	34		3.1	3.1	0	6.5	90.4	978
D. virilis	Dvir.2.1.0.pass.miniasm.assembly.fasta	pass	0	0		165914532	141	4067820	83	40		1.1	1.1	0	3	95.9	978
D. willistoni	Dwil.2.1.0.pass.miniasm.assembly.fasta	pass	0	0		197704393	490	1540700	270	49		0.6	0.6	0	1.9	97.5	978
D. yakuba	Dyak.2.1.0.pass.miniasm.assembly.fasta	pass	0	0		141147110	111	5163216	68	32		1.3	1.3	0	4.7	94	978
D. ananassae	Dana.2.1.0.allReads.miniasm.assembly.fasta	allReads	0	0		179369893	381	3267404	146	34		1.1	1.1	0	3.1	95.8	978
D. biarmipes	Dbia.2.1.0.allReads.miniasm.assembly.fasta	allReads	0	0		184984808	662	2624398	221	31		3.3	3.3	0	9.2	87.5	978
D. bipectinata	Dbip.2.1.0.allReads.miniasm.assembly.fasta	allReads	0	0		162316435	554	582287	348	27		1.5	1.5	0	3.3	95.2	978
D. erecta	Dere.2.1.0.allReads.miniasm.assembly.fasta	allReads	0	0		127467429	62	16637489	29	21		2	2	0	4.6	93.4	978
D. eugracilis	Deug.2.1.0.allReads.miniasm.assembly.fasta	allReads	0	0		157557806	584	985265	260	40		0.5	0.5	0	3	96.5	978
D. mauritiana	Dmau.2.1.0.allReads.miniasm.assembly.fasta	allReads	0	0		131714344	275	4645959	65	27		1.4	1.4	0	3.2	95.4	978
D. mojavensis	Dmoj.2.1.0.allReads.miniasm.assembly.fasta	allReads	0	0		163035255	123	5038894	88	38		0.7	0.7	0	2.5	96.8	978
D. persimilis	Dper.2.1.0.allReads.miniasm.assembly.fasta	allReads	0	0		165714966	412	3365402	139	35		0.4	0.4	0	3	96.6	978
D. pseudoobscura	Dpse.2.1.0.allReads.miniasm.assembly.fasta	allReads	0	0		160438605	355	2904468	136	34		1.7	1.7	0	4.8	93.5	978
D. sechellia	Dsec.2.1.0.allReads.miniasm.assembly.fasta	allReads	0	0		134310094	113	7416876	62	24		1.7	1.7	0	3.9	94.4	978
D. simulans	Dsim.2.1.0.allReads.miniasm.assembly.fasta	allReads	0	0		133050646	86	6999196	63	24		2.7	2.7	0	7.2	90.1	978
D. triauraria	Dtriauraria.2.1.0.allReads.miniasm.assembly.fasta	allReads	0	0		172754309	496	740767	333	35		3	3	0	6.6	90.4	978
D. virilis	Dvir.2.1.0.allReads.miniasm.assembly.fasta	allReads	0	0		167180597	152	3705765	84	40		0.9	0.9	0	3	96.1	978
D. willistoni	Dwil.2.1.0.allReads.miniasm.assembly.fasta	allReads	0	0		198305250	482	1550658	263	48		0.4	0.4	0	1.8	97.8	978
D. yakuba	Dyak.2.1.0.allReads.miniasm.assembly.fasta	allReads	0	0		141735102	117	5163437	72	33		1.2	1.2	0	5	93.8	978
